# Supplementary material
Source: PubMed Central journal article supplement (PMC1449641)
Supplement: pnas_0510928103_5.pdf [file pnas_0510928103_5.pdf]

**Table 1. mRNAs down-regulated by miR-125b in P19 cells**

| GenBank accession no. | Symbol        | Protein encoded                                    | Number of putative miR-125b-responsive elements |     |        |       | Change in mRNA concentration $\pm$ miR-125b | SD   | <i>p</i> value |
|-----------------------|---------------|----------------------------------------------------|-------------------------------------------------|-----|--------|-------|---------------------------------------------|------|----------------|
|                       |               |                                                    | 1-8                                             | 2-8 | 1, 3-9 | Total |                                             |      |                |
| NM_172284             | Ddx19b        | DEAD-box polypeptide 19b                           | 1                                               | 0   | 0      | 1     | 1.85                                        | 0.20 | 0.00251        |
| NM_145833             | Lin28         | Lin-28                                             | 1                                               | 0   | 1      | 2     | 1.68                                        | 0.05 | 0.00006        |
| NM_026824             | Dus11         | Dihydrouridine synthase 1-like                     | 1                                               | 0   | 0      | 1     | 1.65                                        | 0.04 | 0.00005        |
| NM_007880             | Arid3a        | AT-rich interactive domain 3A (Bright like)        | 2                                               | 4   | 0      | 6     | 1.61                                        | 0.09 | 0.00034        |
| NM_019689             | Arid3b        | AT-rich interactive domain 3B (Bright like)        | 1                                               | 1   | 0      | 2     | 1.55                                        | 0.06 | 0.00025        |
| XM_130148             | B230208H17Rik | FLJ10101 homolog                                   | 1                                               | 0   | 0      | 1     | 1.54                                        | 0.08 | 0.00048        |
| NM_026174             | Entpd4        | Ectonucleoside triphosphate diphosphohydrolase 4   | 0                                               | 1   | 0      | 1     | 1.53                                        | 0.07 | 0.00025        |
| NM_013866             | Zfp385        | Zinc finger protein 385                            | 0                                               | 0   | 2      | 2     | 1.53                                        | 0.09 | 0.00068        |
| NM_013912             | Apln          | Apelin                                             | 0                                               | 0   | 1      | 1     | 1.47                                        | 0.06 | 0.00014        |
| NM_030251             | Abtb1         | Ankyrin repeat and BTB (POZ) domain containing 1   | 1                                               | 0   | 0      | 1     | 1.46                                        | 0.02 | 0.00001        |
| NM_010590             | Jub           | Ajuba                                              | 1                                               | 0   | 0      | 1     | 1.46                                        | 0.05 | 0.00027        |
| NM_026967             | Rheb11        | Ras homolog enriched in brain like 1               | 1                                               | 0   | 0      | 1     | 1.44                                        | 0.03 | 0.00009        |
| NM_019441             | Ppt2          | Palmitoyl-protein thioesterase 2                   | 0                                               | 1   | 0      | 1     | 1.42                                        | 0.06 | 0.00036        |
| NM_152800             | Tor2a         | Torsin family 2, member A                          | 1                                               | 0   | 0      | 1     | 1.42                                        | 0.03 | 0.00002        |
| NM_011944             | MKK7          | Mitogen activated protein kinase kinase 7 (Map2k7) | 0                                               | 1   | 0      | 1     | 1.40                                        | 0.04 | 0.00013        |
|                       |               | Total                                              | 11                                              | 8   | 4      | 23    |                                             |      |                |

Triplicate cultures of undifferentiated P19 cells were transfected with chemically synthesized miR-125b (5'-UCCCUGAGACCCUAACUUGUGA-3' base paired with 5'-ACAAGUUAGGGUCUCAGGGAUU-3'; Dharmacon). After 24 h, total cytoplasmic RNA was extracted from these cells and from triplicate cultures of mock-transfected cells, and the relative concentrations of mouse mRNAs were examined by probing Mouse Genome 430A 2.0 arrays (Affymetrix). The mRNAs

listed are those whose concentration could be said with a high degree of certainty to have decreased significantly in the presence of miR-125b (by at least a factor of 1.40, with  $\geq 95\%$  confidence that the change was by at least a factor of 1.30) and whose 3' UTR contained at least one likely miR-125b-responsive element [defined as an element complementary to nucleotides 1-8, nucleotides 2-8, or nucleotides 1 and 3-9 of miR-125b (1, 2)].

1. Lewis, B. P., Shih, I. H., Jones-Rhoades, M. W., Bartel, D. P. & Burge, C. B. (2003) *Cell* **115**, 787–798.
2. Wu, L. & Belasco, J. G. (2005) *Mol. Cell. Biol.* **25**, 9198–9208.
