# Supplementary material
Source: PubMed Central journal article supplement (PMC1449641)

**A**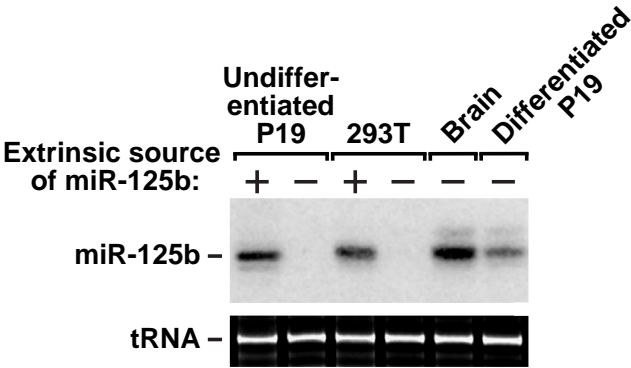**B**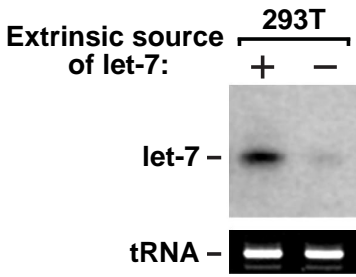

Supplement: pnas_0510928103_1.pdf [file pnas_0510928103_1.pdf]

**A****lin-28 miRE2 + miR-125b:**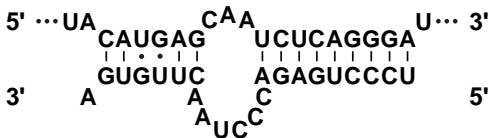**B**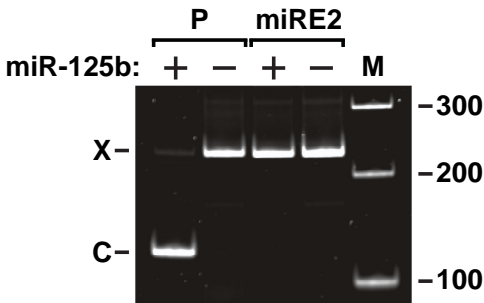

Supplement: pnas_0510928103_2.pdf [file pnas_0510928103_2.pdf]

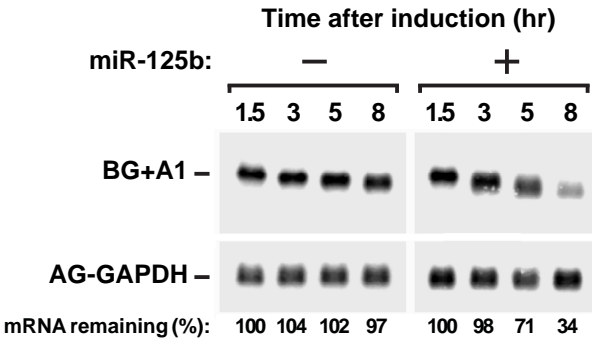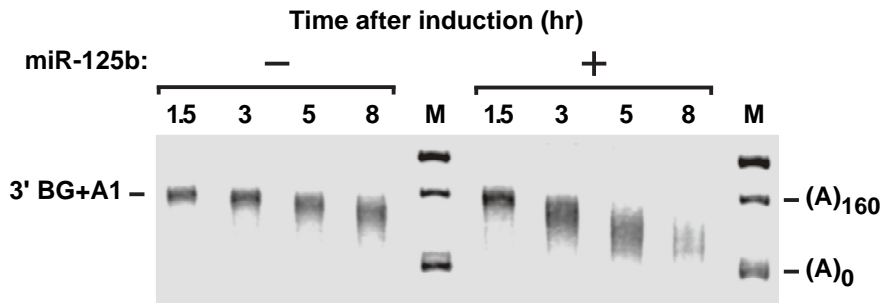

Supplement: pnas_0510928103_3.pdf [file pnas_0510928103_3.pdf]
